# Supplementary material for: Metabolic and co-expression network-based analyses associated with nitrate response in rice
Source: PubMed Central journal article supplement (PMC4301927; doi:10.1186/1471-2164-15-1056), 2014-12-03
Supplement: 12864_2014_6767_MOESM1_ESM.pdf [file 12864_2014_6767_MOESM1_ESM.pdf]

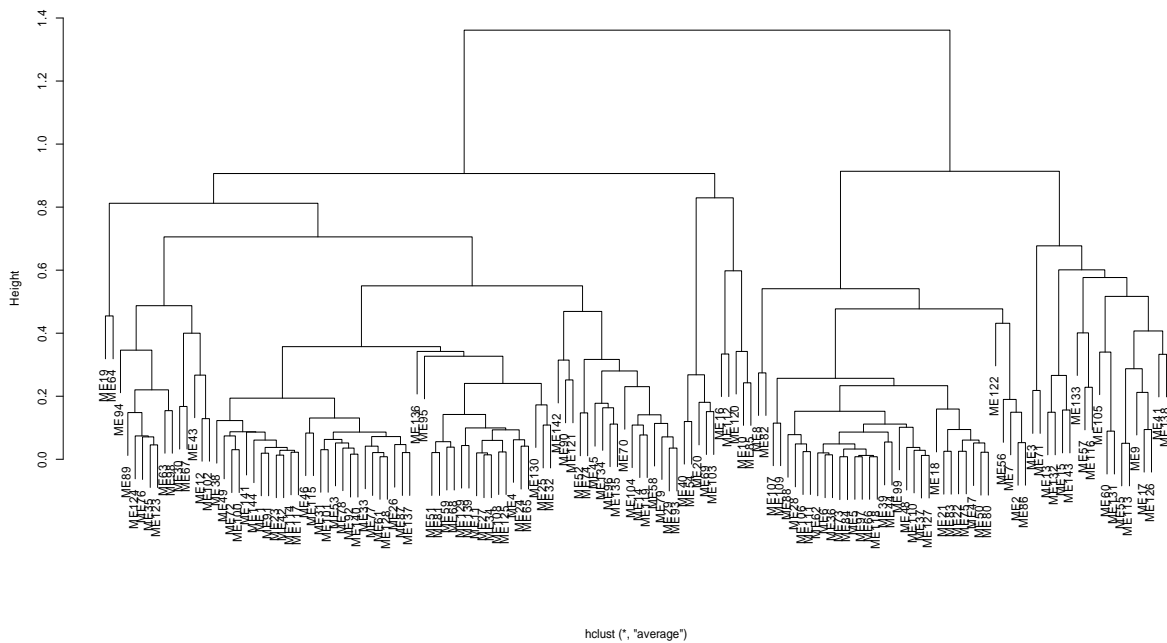

**Additional file 1. Dendrogram of original module eigengenes.** The dendrogram was created after hierarchical clustering of the TOM matrix by complete linkage and Euclidean distance before merging. The tree was cut using a dynamic tree cutting algorithm. A large number of modules impeded further analysis as the modules were very similar, and did not contain enough entities for GO term enrichment analysis.
