# Supplementary material for: Metabolic and co-expression network-based analyses associated with nitrate response in rice
Source: PubMed Central journal article supplement (PMC4301927; doi:10.1186/1471-2164-15-1056), 2014-12-03
Supplement: 12864_2014_6767_MOESM3_ESM.pdf [file 12864_2014_6767_MOESM3_ESM.pdf]

| GO Information |      |                                         | Leaf     | Module 6  |
|----------------|------|-----------------------------------------|----------|-----------|
| GO Term        | Onto | Description                             | HN vs LN | (Leaf LN) |
| GO:0030554     | F    | adenyl nucleotide binding               |          |           |
| GO:0001883     | F    | purine nucleoside binding               |          |           |
| GO:0001882     | F    | nucleoside binding                      |          |           |
| GO:0017076     | F    | purine nucleotide binding               |          |           |
| GO:0032559     | F    | adenyl ribonucleotide binding           |          |           |
| GO:0005524     | F    | ATP binding                             |          |           |
| GO:0032553     | F    | ribonucleotide binding                  |          |           |
| GO:0032555     | F    | purine ribonucleotide binding           |          |           |
| GO:0004713     | F    | protein tyrosine kinase activity        |          |           |
| GO:0000166     | F    | nucleotide binding                      |          |           |
| GO:0004674     | F    | protein serine/threonin kinase activity |          |           |
| GO:0004762     | F    | protein kinase activity                 |          |           |

**P-value**

- e-10
- e-9
- e-8
- e-7
- e-6
- e-5
- e-4
- e-3
- 0.05
- > 0.05

**Additional file 3.** Comparison of GO terms enrichment between a list of differentially expressed genes in leaves (low vs. high nitrogen, column 1) and entities in Module 6 (column 2). Only significant GO terms are displayed. Colored boxes indicate levels of statistical significance according to the scale (yellow to red represent decreasing p-values; and gray represents a non-significant result). Onto refers to the ontology category: F, Molecular function; P, Biological process; C, Cellular component.
