# Supplementary material for: Metabolic and co-expression network-based analyses associated with nitrate response in rice
Source: PubMed Central journal article supplement (PMC4301927; doi:10.1186/1471-2164-15-1056), 2014-12-03
Supplement: 12864_2014_6767_MOESM5_ESM.pdf [file 12864_2014_6767_MOESM5_ESM.pdf]

**Additional file 5. Module Membership (MM) ranking of transcription factor related genes within clusters.** Highest rank and p-value is compared after performing rank analysis using three different databases for rice transcription-related entities. Significant top ranked TFs are indicated in bold. n/f, none found; n/s, not significant.

| Cluster   | # of genes in cluster | Highest rank of TF related gene |                      |                   |
|-----------|-----------------------|---------------------------------|----------------------|-------------------|
|           |                       | MapMan<br>(p-value)             | PlnTFDB<br>(p-value) | DRTF<br>(p-value) |
| Module 1  | 469                   | 24 (0.8852)                     | 24 (0.8796)          | 24 (0.8062)       |
| Module 2  | 376                   | 40 (0.8766)                     | 27 (0.6608)          | 27 (0.6624)       |
| Module 3  | 743                   | 27 (0.7222)                     | 61 (0.9352)          | 61 (0.9089)       |
| Module 4  | 270                   | 10 (0.2474)                     | 19 (0.4688)          | 44 (0.7022)       |
| Module 5  | 157                   | 5 (0.3739)                      | 5 (0.3490)           | 5 (0.3217)        |
| Module 6  | 2880                  | 123 (0.9562)                    | 52 (0.8822)          | 52 (0.7790)       |
| Module 7  | 11861                 | 95 (0.9578)                     | 94 (0.9571)          | 108 (0.9550)      |
| Module 8  | 694                   | 9 (0.6725)                      | 9 (0.5442)           | 9 (0.3335)        |
| Module 9  | 1343                  | 15 (0.5970)                     | 15 (0.4734)          | 15 (0.2814)       |
| Module 10 | 3337                  | 7 (0.1829)                      | 7 (0.1673)           | 7 (0.1340)        |
| Module 11 | 610                   | <b>1 (0.0605)</b>               | <b>1 (0.0559)</b>    | <b>1 (0.0518)</b> |
| Module 12 | 390                   | 41 (0.819)                      | 13 (0.3029)          | 13 (0.2254)       |
| Module 13 | 102                   | n/f                             | 10 (0.2721)          | 10 (0.2193)       |
| Module 14 | 604                   | <b>1 (0.0481)</b>               | <b>1 (0.0461)</b>    | <b>1 (0.0459)</b> |
| Module 15 | 8907                  | 27 (0.9116)                     | 27 (0.8674)          | 27 (0.7811)       |
| Module 16 | 431                   | 2 (0.0712)                      | 8 (0.2745)           | 8 (0.2454)        |
| Module 17 | 195                   | 10 (0.4050)                     | 14 (0.6617)          | 14 (0.4793)       |
| Module 18 | 233                   | 176 (n/s)                       | 176 (n/s)            | 161 (n/s)         |
