# Supplementary material for: Metabolic and co-expression network-based analyses associated with nitrate response in rice
Source: PubMed Central journal article supplement (PMC4301927; doi:10.1186/1471-2164-15-1056), 2014-12-03
Supplement: 12864_2014_6767_MOESM6_ESM.pdf [file 12864_2014_6767_MOESM6_ESM.pdf]

**Additional file 6.** Summary of the number of changes in the metabolic profile in rice under different nitrate treatments according to Welch's two sample t-test comparisons.

| Tissue |                       | Treatment |            |            |
|--------|-----------------------|-----------|------------|------------|
|        |                       | HN / LN   | LN-HN / LN | HN-LN / HN |
| Leaves | Total number (p<0.05) | 212       | 30         | 153        |
|        | Biochemicals (↑ ↓)    | 109   103 | 13   17    | 106   47   |
| Roots  | Total number (p<0.05) | 136       | 51         | 31         |
|        | Biochemicals (↑ ↓)    | 88   48   | 5   46     | 21   10    |
