# Supplementary material for: Metabolic and co-expression network-based analyses associated with nitrate response in rice
Source: PubMed Central journal article supplement (PMC4301927; doi:10.1186/1471-2164-15-1056), 2014-12-03
Supplement: 12864_2014_6767_MOESM7_ESM.pdf [file 12864_2014_6767_MOESM7_ESM.pdf]

**Additional file 7.** Metabolic profile of amino acids in leaves and roots of rice plants subjected to different nitrate treatments. Fold change (ratio of means) are shown. Colored cells (red=increase; green=decrease) indicate significant change for the indicated t-test ( $p < 0.05$ ).

| Amino acid    | Pathway                                       | Leaf  |            |            | Root  |            |            |
|---------------|-----------------------------------------------|-------|------------|------------|-------|------------|------------|
|               |                                               | HN/LN | LN-HN / LN | HN-LN / HN | HN/LN | LN-HN / LN | HN-LN / HN |
| Alanine       | Alanine and aspartate metabolism              | 1.16  | 0.75       | 1.42       | 1.42  | 0.92       | 1.08       |
| Aspartate     |                                               | 6.67  | 1.38       | 0.73       | 2.99  | 1.69       | 1.03       |
| Asparagine    |                                               | 8.08  | 0.88       | 6.92       | 10.29 | 1.27       | 1.28       |
| Methionine    | Cysteine, methionine, SAM, taurine metabolism | 3.55  | 0.96       | 1.60       | 1.71  | 0.83       | 1.09       |
| Glutamate     | Glutamate metabolism                          | 1.54  | 1.20       | 1.59       | 0.99  | 1.46       | 1.49       |
| Glutamine     |                                               | 1.47  | 1.06       | 3.93       | 2.29  | 1.36       | 1.21       |
| Glycine       | Glycine, serine and threonine metabolism      | 1.93  | 0.97       | 2.12       | 1.53  | 1.30       | 1.30       |
| Serine        |                                               | 1.43  | 0.96       | 2.52       | 1.45  | 0.89       | 1.34       |
| Threonine     |                                               | 2.48  | 0.91       | 2.31       | 4.82  | 0.99       | 0.87       |
| Histidine     | Histidine metabolism                          | 3.46  | 0.87       | 2.52       | 4.61  | 1.20       | 1.13       |
| Lysine        | Lysine metabolism                             | 2.27  | 0.80       | 1.93       | 1.56  | 0.67       | 1.06       |
| Phenylalanine | Phenylalanine and tyrosine metabolism         | 1.81  | 0.95       | 1.56       | 1.27  | 0.71       | 1.04       |
| Tyrosine      |                                               | 2.56  | 0.99       | 1.95       | 1.31  | 0.78       | 1.01       |
| Tryptophan    | Tryptophan metabolism                         | 0.86  | 0.72       | 1.88       | 0.15  | 0.76       | 9.74       |
| Arginine      | Urea cycle; arginine and proline metabolism   | 2.74  | 0.86       | 3.19       | 0.58  | 2.09       | 1.52       |
| Proline       |                                               | 1.42  | 0.94       | 1.34       | 1.96  | 0.78       | 0.72       |
| Isoleucine    | Valine, leucine and isoleucine metabolism     | 3.00  | 0.92       | 2.17       | 2.99  | 0.85       | 0.82       |
| Leucine       |                                               | 1.92  | 0.78       | 1.44       | 1.75  | 0.79       | 0.86       |
| Valine        |                                               | 2.38  | 0.88       | 1.78       | 2.37  | 0.82       | 0.87       |
