# Supplementary material for: Metabolic and co-expression network-based analyses associated with nitrate response in rice
Source: PubMed Central journal article supplement (PMC4301927; doi:10.1186/1471-2164-15-1056), 2014-12-03
Supplement: 12864_2014_6767_MOESM9_ESM.pdf [file 12864_2014_6767_MOESM9_ESM.pdf]

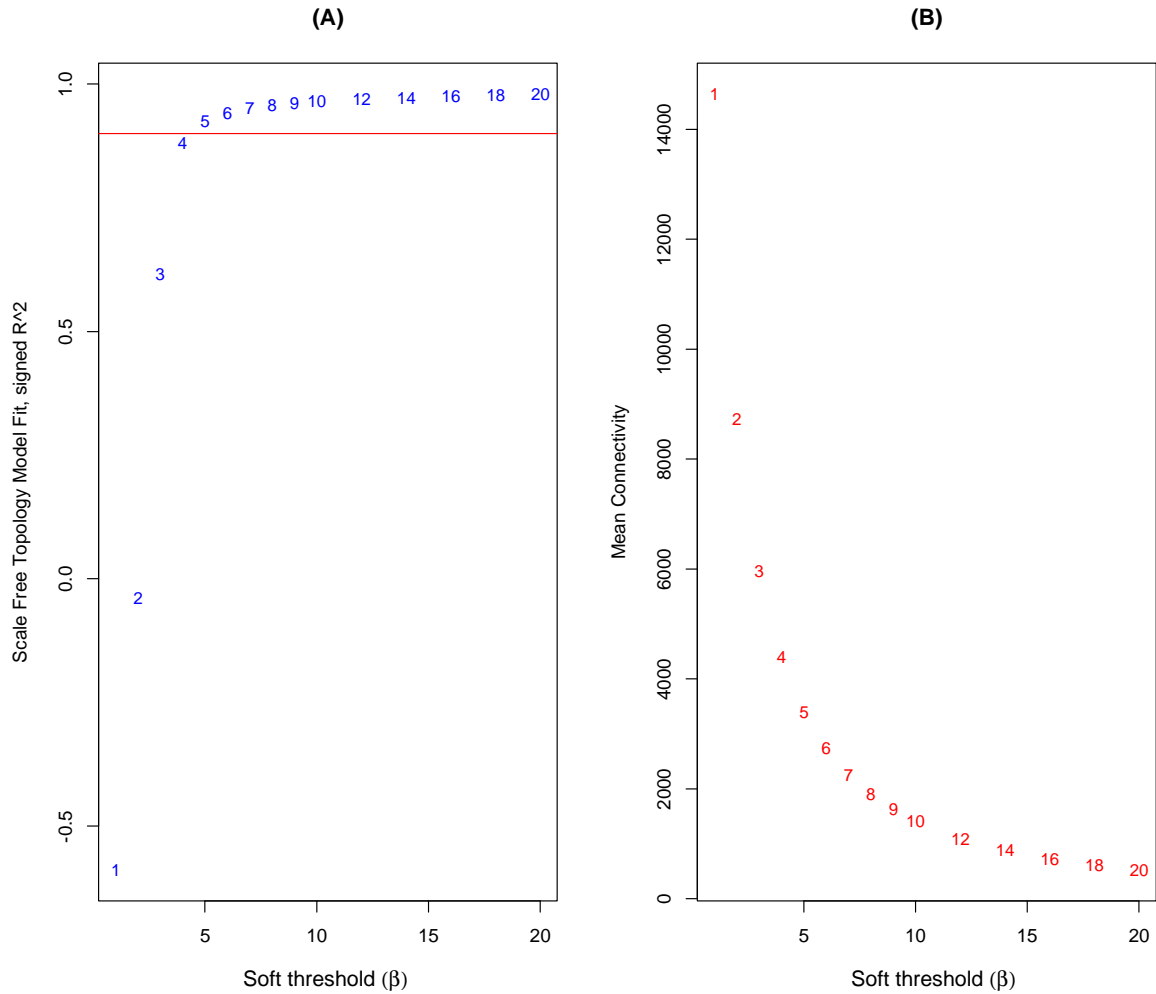

**Additional file 9. Weighted adjacency matrix that describes pair wise similarities between probe pairs.** (A) Scale independence of soft-threshold  $\beta$ . The plot describes the relationship between possible  $\beta$  options and the scale free topology model fit  $R^2$  value. A soft threshold  $\beta = 4$  was ultimately chosen as it was the lowest power observed before the scale free topology curve reached  $R^2=0.90$ . (B) Mean connectivity of soft-threshold  $\beta$ . Mean network connectivity represents the connections between all nodes. The soft threshold  $\beta = 4$  maintained a high mean network connectivity and demonstrated scale-free topology.
